# Supplementary material for: Photoresponsive CuS@polyaniline nanocomposites: An excellent synthetic bactericide against several multidrug-resistant pathogenic strains
Source: Royal Society of Chemistry journal article supplement (doi:10.1039/d3qi01316b), 2023-01-01
Supplement: d3qi01316b1.pdf [file d3qi01316b1.pdf]

1

## Supporting Information

### 2 **Photoresponsive CuS@Polyaniline nanocomposites: An excellent synthetic** 3 **bactericide against several multidrug-resistant pathogenic strains**

4 **Basit Ali Shah<sup>1,2\*</sup>, Asma Sardar<sup>2</sup>, Weiliang Peng<sup>1</sup>, Syed Taj Ud Din<sup>3</sup>, Syed Hamayoun<sup>4</sup>,**  
5 **Shaobo Li<sup>1</sup>, Bin Yuan<sup>1,5</sup>**

6

7 <sup>1</sup>School of Materials Science & Engineering, South China University of Technology (SCUT)  
8 Guangzhou 510640, People's Republic of China

9 <sup>2</sup>Department of Chemistry Hazara University Mansehra, Pakistan

10 <sup>3</sup>Department of Physics, Dongguk University, Seoul 04620, Korea

11 <sup>4</sup>Faculty of Animal Husbandry and Veterinary Sciences, Department of Pathology, The University  
12 of Agriculture, Peshawar 25130, Pakistan

13 <sup>5</sup>GuangDong Engineering Technology Research Center of Advanced Energy Storage Materials,  
14 Guangzhou 510640, P. R. China

15

16

17 **\*Corresponding author: [basitalimrz@gmail.com](mailto:basitalimrz@gmail.com) or [apsheng@scut.edu.cn](mailto:apsheng@scut.edu.cn)**

18

19

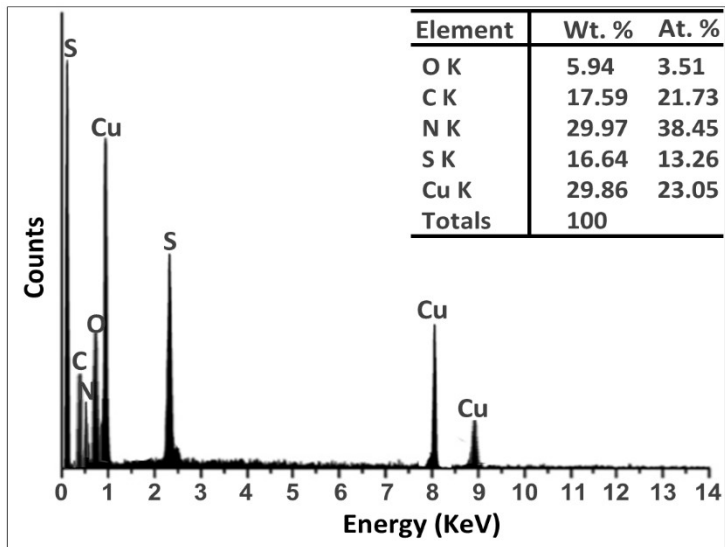

1

2 Figure S1 EDS spectrum with inset table of atomic/weight elemental percentages of the CuS@PANI NCs

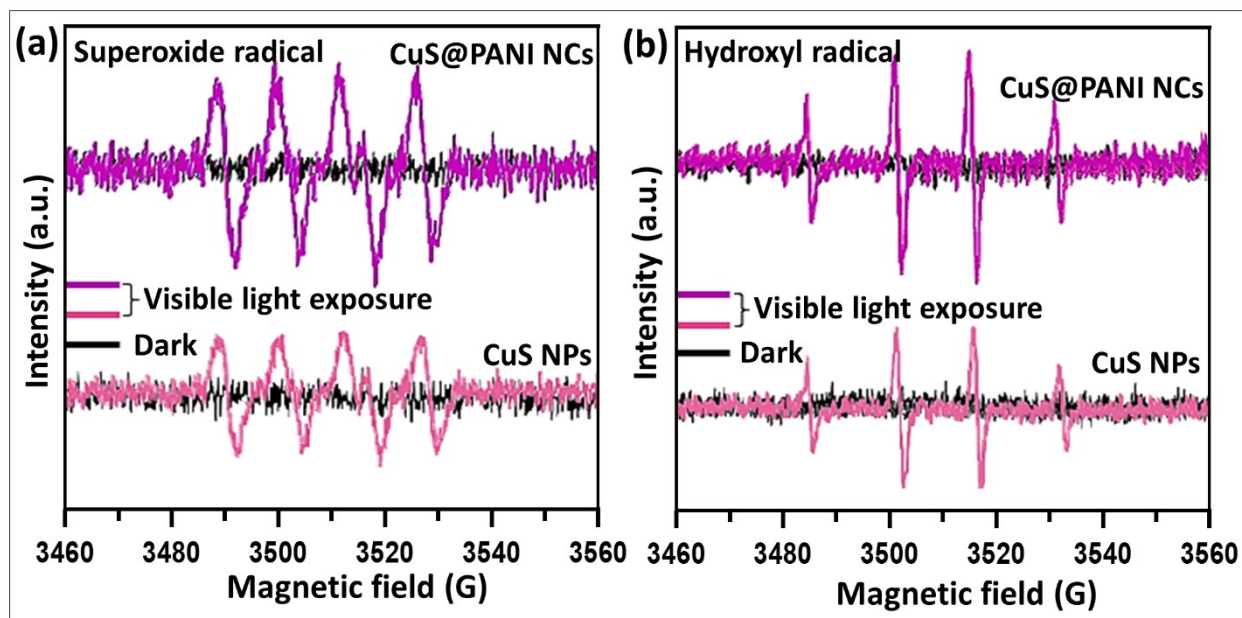

3

4 Figure S2 ESR spectra of (a) DMPO- $\cdot\text{O}_2^-$  and (b) DMPO- $\text{OH}\cdot$  for CuS and CuS@PANI samples under Dark  
5 conditions and 20 min of visible light irradiations

6

7 Table S1 The relative bactericidal effectiveness of the as-prepared CuS@PANI NCs with reported literatures

| Materials                                                      | MIC ( $\mu\text{g}\cdot\text{ml}^{-1}$ ) | Effectiveness       | Pathogens                                                                                   |
|----------------------------------------------------------------|------------------------------------------|---------------------|---------------------------------------------------------------------------------------------|
| MoS <sub>2</sub> @Polydopamine-Ag <sup>86</sup>                | 125                                      | > 95 %              | <i>S. aureus</i> , <i>E. coli</i>                                                           |
| PEG@CuS/g-C <sub>3</sub> N <sub>4</sub> <sup>1</sup>           | 200                                      | > 95 %              | <i>S. aureus</i> , <i>E. coli</i>                                                           |
| Polydopamine@SnS/g-C <sub>3</sub> N <sub>4</sub> <sup>38</sup> | 45                                       | > 90 %              | <i>A. fumigatus</i> , and <i>A. flavus</i> ,<br><i>E. faecalis</i> , <i>P. aeruginosa</i> . |
| CuS/protonated g-C <sub>3</sub> N <sub>4</sub> <sup>37</sup>   | 40 %                                     | > 98 % <sup>e</sup> | <i>S. aureus</i> , <i>E. coli</i>                                                           |
| GO-COOH-CuS-5 <sup>74</sup>                                    | ---                                      | > 90 %              | <i>E. coli</i> , <i>B. subtilis</i>                                                         |
| CuS@Ti <sub>3</sub> C <sub>2</sub> T <sub>x</sub> <sup>2</sup> | 500                                      | > 95 %              | <i>S. aureus</i> , <i>E. coli</i>                                                           |
| CuS@Corn stalk/chitin <sup>73</sup>                            | ---                                      | Active              | <i>S. aureus</i> , <i>E. coli</i>                                                           |
| CuS-BSA <sup>3</sup>                                           | 50 ppm                                   | 80 %                | <i>S. aureus</i> , <i>E. coli</i>                                                           |
| CuS-BSA/Lysozyme <sup>4</sup>                                  | 200                                      | Active              | <i>B. subtilis</i> , <i>E. coli</i>                                                         |
| CuS@PANI<br>(This work)                                        | 30                                       | Active              | <i>S. aureus</i> , <i>S. pneumoniae</i> ,<br><i>E. coli</i> , and <i>P. aeruginosa</i>      |

1

2

3

4

5

6

7

8

9

## 1 References

- 2 1 X. Liu, X. Li, Y. Shan, Y. Yin, C. Liu, Z. Lin, S.S. Kumar, CuS nanoparticles anchored to  
3 g-C<sub>3</sub>N<sub>4</sub> nanosheets for photothermal ablation of bacteria, *RSC Adv.*, 2020, **10**, 12183–  
4 12191. <https://doi.org/10.1039/d0ra00566e>
- 5 2 Q. Li, W. Wang, H. Feng, L. Cao, H. Wang, D. Wang, S. Chen, NIR-triggered  
6 photocatalytic and photothermal performance for sterilization based on copper sulfide  
7 nanoparticles anchored on Ti<sub>3</sub>C<sub>2</sub>T<sub>x</sub> MXene, *J. Colloid Interface Sci.*, 2021, **604**, 810–822.  
8 <https://doi.org/10.1016/j.jcis.2021.07.048>
- 9 3 Y. Zhao, Q. Cai, W. Qi, Y. Jia, T. Xiong, Z. Fan, S. Liu, J. Yang, N. Li and B. Chang, BSA-  
10 CuS nanoparticles for photothermal therapy of diabetic wound infection in vivo, *Chemistry*  
11 *Select*, 2018, **3**, 9510–9516. <https://doi.org/10.1002/slct.201802069>
- 12 4 A. Swaidan, S. Ghayyem, A. Barras, A. Addad, S. Szunerits and R. Boukherroub, Enhanced  
13 antibacterial activity of CuS-BSA/lysozyme under near infrared light  
14 irradiation, *Nanomaterials (Basel)*, 2021, **11**, 2156. <https://doi.org/10.3390/nano11092156>
